# Supplementary material for: Lipid unsaturation promotes BAX and BAK pore activity during apoptosis
Source: PubMed Central journal article supplement (PMC11148036; doi:10.1038/s41467-024-49067-6), 2024-06-03
Supplement: 41467_2024_49067_MOESM3_ESM.pdf [file 41467_2024_49067_MOESM3_ESM.pdf]

## **Description of Additional Supplementary Files**

File Name: Supplementary Data 1

Description: Cardiolipins metadata contains spectral data and associated data (Nano-ESI-MS/MS) used to identify metabolites relevant for hypothesis generation.

File Name: Supplementary Data 2

Description: Ceramides/sphingomyelins metadata contains spectral data and associated data (Nano-ESI-MS/MS) used to identify metabolites relevant for hypothesis generation.

File Name: Supplementary Data 3

Description: Fatty acids metadata contains spectral data and associated data (Nano-ESI-MS/MS) used to identify metabolites relevant for hypothesis generation.

File Name: Supplementary Data 4

Description: GPLs Metadata contains spectral data and associated data (Nano-ESI-MS/MS) used to identify metabolites relevant for hypothesis generation.
